# Supplementary material for: Rational electrolyte design and electrode regulation for boosting high-capacity Zn-iodine fiber-shaped batteries with four-electron redox reactions
Source: Royal Society of Chemistry journal article supplement (doi:10.1039/d3nr06195g), 2024-01-01
Supplement: d3nr06195g1.pdf [file d3nr06195g1.pdf]

## Supporting Information

### **Rational Electrolyte Design and Electrode Regulation Boosting High Capacity Zn-iodine Fiber-Shaped Batteries with Four- Electron Redox Reactions**

*Jiuqing Wang<sup>a,#</sup>, Hai Xu<sup>a,#</sup>, Ruanye Zhang<sup>a</sup>, Gengzhi Sun<sup>b</sup>, Hui Dou<sup>a,\*</sup>, Xiaogang  
Zhang<sup>a</sup>*

*<sup>a</sup> Jiangsu Key Laboratory of Electrochemical Energy Storage Technologies, College  
of Materials Science and Technology, Nanjing University of Aeronautics and  
Astronautics, Nanjing 210016, P. R. China*

Email: [dh\\_msc@nuaa.edu.cn](mailto:dh_msc@nuaa.edu.cn) (H. Dou)

*<sup>b</sup> Institute of Advanced Materials (IAM), Nanjing Tech University, Nanjing 211816, P.  
R. China*

---

<sup>#</sup> These authors contributed equally to this work.

<sup>\*</sup> E-mail: [dh\\_msc@nuaa.edu.cn](mailto:dh_msc@nuaa.edu.cn) (H. Dou)

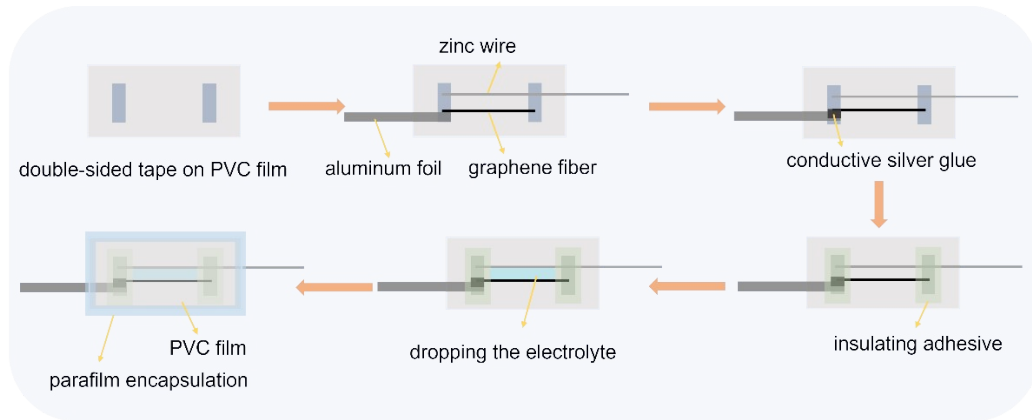

Fig. S1. Schematic illustration of the fabrication of AZIFBs.

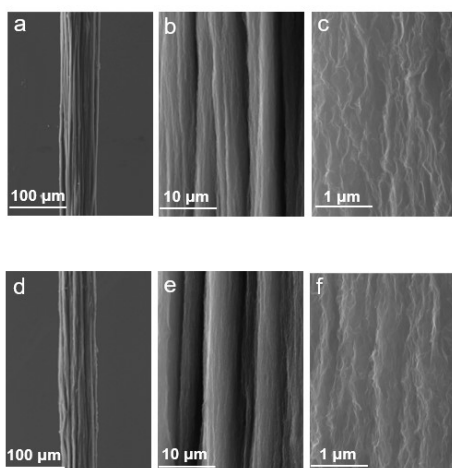

Fig. S2. (a-c) SEM images of GF-160. (d-f) SEM images of GF-200.

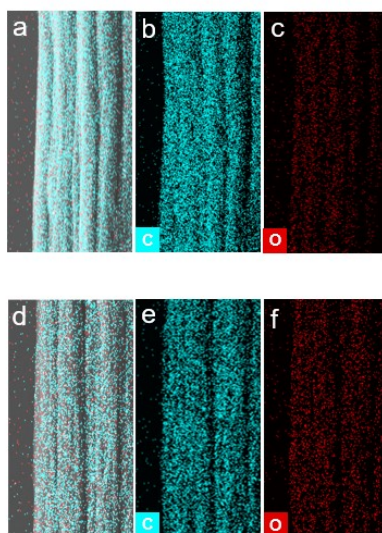

Fig. S3. (a-c) EDS images of GF-160.

(d-f) EDS images of GF-200.

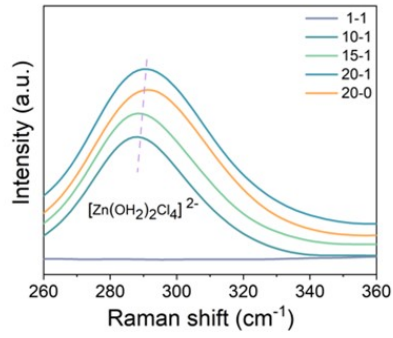

Fig. S4. The Raman spectra of different electrolytes.

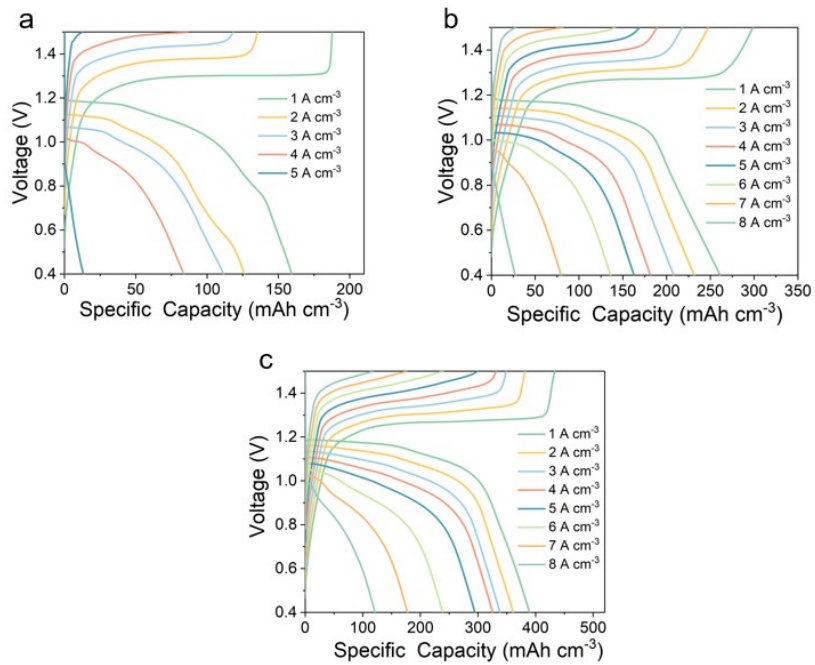

Fig. S5. GCD curves of GF-180 based on various electrolyte of

(a) 10-1, (b) 15-1 and (c) 20-1.

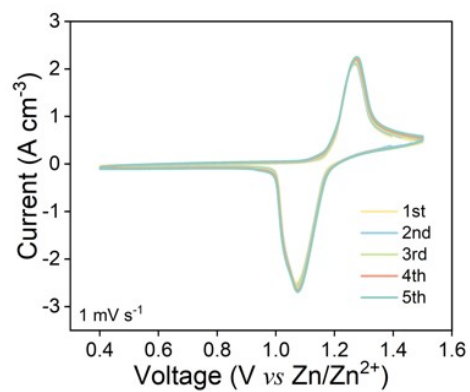

Fig. S6. CV curves of the GF-180 based on 20-1 at a scan rate of  $1 \text{ mV s}^{-1}$ .

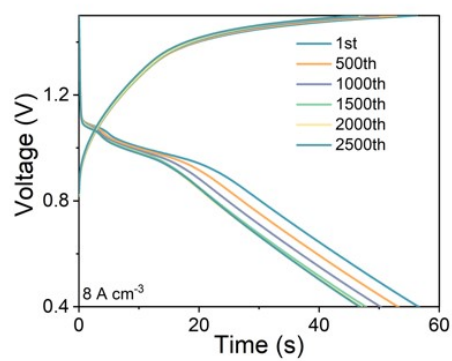

Fig. S7. GCD curves of GF-180 based on 20-1 at  $8 \text{ A cm}^{-3}$ .

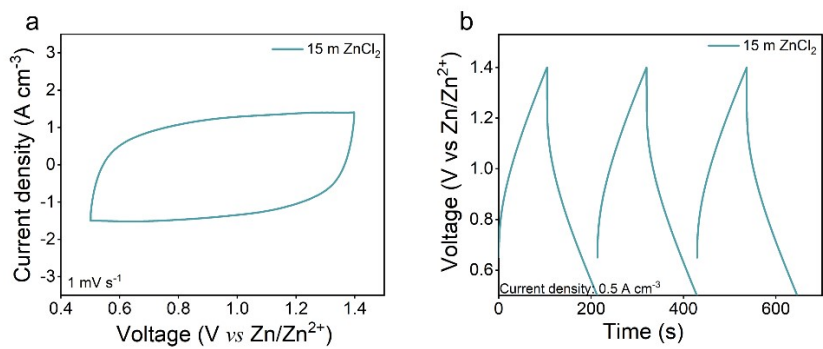

Fig. S8. (a) CV curves and (b) GCD curves of the GF-180 based on 15 m ZnCl<sub>2</sub>.

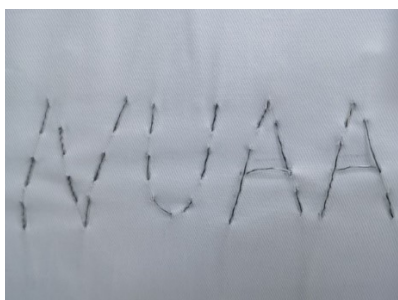

Fig. S9. Photographs of the AZIFBs into textile.

Table S1. Number of cycles and capacity retention for fibrous batteries.

| Materials                                                                       | Electrolytes                                                       | Cycle numbers | Capacity retention | Refs.        |
|---------------------------------------------------------------------------------|--------------------------------------------------------------------|---------------|--------------------|--------------|
| GF-180 (cathode)<br>Zn Wire (anode)                                             | 20 m ZnCl <sub>2</sub> + 1<br>m MAI                                | 2500          | 82.1%              | This<br>work |
| MnO <sub>2</sub> -based fiber (cathode)<br>Zn-based fiber (anode)               | 2 M ZnSO <sub>4</sub> +<br>0.1 M MnSO <sub>4</sub>                 | 400           | 65.7%              | 1            |
| InHCF (cathode)<br>NTP@CNTF (anode)                                             | Na <sub>2</sub> SO <sub>4</sub> -CMC<br>gel electrolyte            | 300           | 91.5%              | 2            |
| Na (cathode)<br>ReS <sub>2</sub> @CNT fiber (anode)                             | 1 M NaPF <sub>6</sub> +<br>EC/DMC/EMC                              | 1500          | 65.4%              | 3            |
| Na (cathode)<br>G@CNT fiber (anode)                                             | 1 M NaPF <sub>6</sub> +<br>EC/DMC/EMC                              | 1000          | 96.8%              | 3            |
| ZnHCF (cathode)<br>Zn NSAs (anode)                                              | ZnSO <sub>4</sub> -CMC                                             | 200           | 91.8%              | 4            |
| MnHCF (cathode)<br>GO/MoO <sub>3</sub> fiber (anode)                            | 1 M<br>Al(CF <sub>3</sub> SO <sub>3</sub> )                        | 100           | 91.6%              | 5            |
| KCY@PANI (cathode)<br>Zn wire (anode)                                           | 0.5 M HCl                                                          | 2000          | 88.1%              | 6            |
| KNHCF/CNTF (cathode)<br>Zn wire (anode)                                         | 2 M<br>ZnSO <sub>4</sub> +0.07 M<br>K <sub>2</sub> SO <sub>4</sub> | 1700          | 86.3%              | 7            |
| CNTF-NCA-Ag <sub>2</sub> O@<br>PEDOT:PSS (cathode)<br>CNT@Zn nanoflakes (anode) | PVA-KOH gel                                                        | 200           | 79.5%              | 8            |
| LMO NWAs/CNTF (cathode)<br>LTP NFs/CNTF (anode)                                 | Li <sub>2</sub> SO <sub>4</sub> -CMC<br>gel                        | 2000          | 54.7%              | 9            |
| V-MOF-48@CNTF (cathode)<br>Zn@CNTF (anode)                                      | PVA-ZnCl <sub>2</sub> gel                                          | 400           | 84.6%              | 10           |

## References:

1. T. Gao, G. Yan, X. Yang, Q. Yan, Y. Tian, J. Song, F. Li, X. Wang, J. Yu and Y. Li, *Journal of Energy Chemistry*, 2022, **71**, 192-200.
2. Q. Zhang, P. Man, B. He, C. Li, Q. Li, Z. Pan, Z. Wang, J. Yang, Z. Wang and Z. Zhou, *Nano Energy*, 2020, **67**, 104212.
3. Y. Li, Q. Guan, J. Cheng and B. Wang, *Energy & Environmental Materials*, 2022, **5**, 1285-1293.
4. Q. Zhang, C. Li, Q. Li, Z. Pan, J. Sun, Z. Zhou, B. He, P. Man, L. Xie and L. Kang, *Nano letters*, 2019, **19**, 4035-4042.
5. T. Xiong, B. He, T. Zhou, Z. Wang, Z. Wang, J. Xin, H. Zhang, X. Zhou, Y. Liu and L. Wei, *EcoMat*, 2022, **4**, e12218.
6. G. Shim, M. X. Tran, G. Liu, D. Byun and J. K. Lee, *Energy Storage Materials*, 2021, **35**, 739-749.
7. F. Liu, S. Xu, W. Gong, K. Zhao, Z. Wang, J. Luo, C. Li, Y. Sun, P. Xue and C. Wang, *ACS nano*, 2023, **17**, 18494–18506.
8. C. Li, Q. Zhang, E. Songfeng, T. Li, Z. Zhu, B. He, Z. Zhou, P. Man, Q. Li and Y. Yao, *Journal of Materials Chemistry A*, 2019, **7**, 2034-2040.
9. X. Zhang, Z. Xu, S. Kong, X. Wang, X. Lan, Z. Ma, Y. Feng, Z. Yong, Y. Yao and Q. Li, *Journal of Energy Storage*, 2023, **64**, 107249.
10. B. He, Q. Zhang, P. Man, Z. Zhou, C. Li, Q. Li, L. Xie, X. Wang, H. Pang and Y. Yao, *Nano Energy*, 2019, **64**, 103935.
